# Supplementary material for: Ubiquitination of the DNA-damage checkpoint kinase CHK1 by TRAF4 is required for CHK1 activation
Source: Springer Nature journal article supplement (doi:10.1186/s13045-020-00869-3), 2020-05-01
Supplement: MOESM1 [file 17948352]

Figure S1

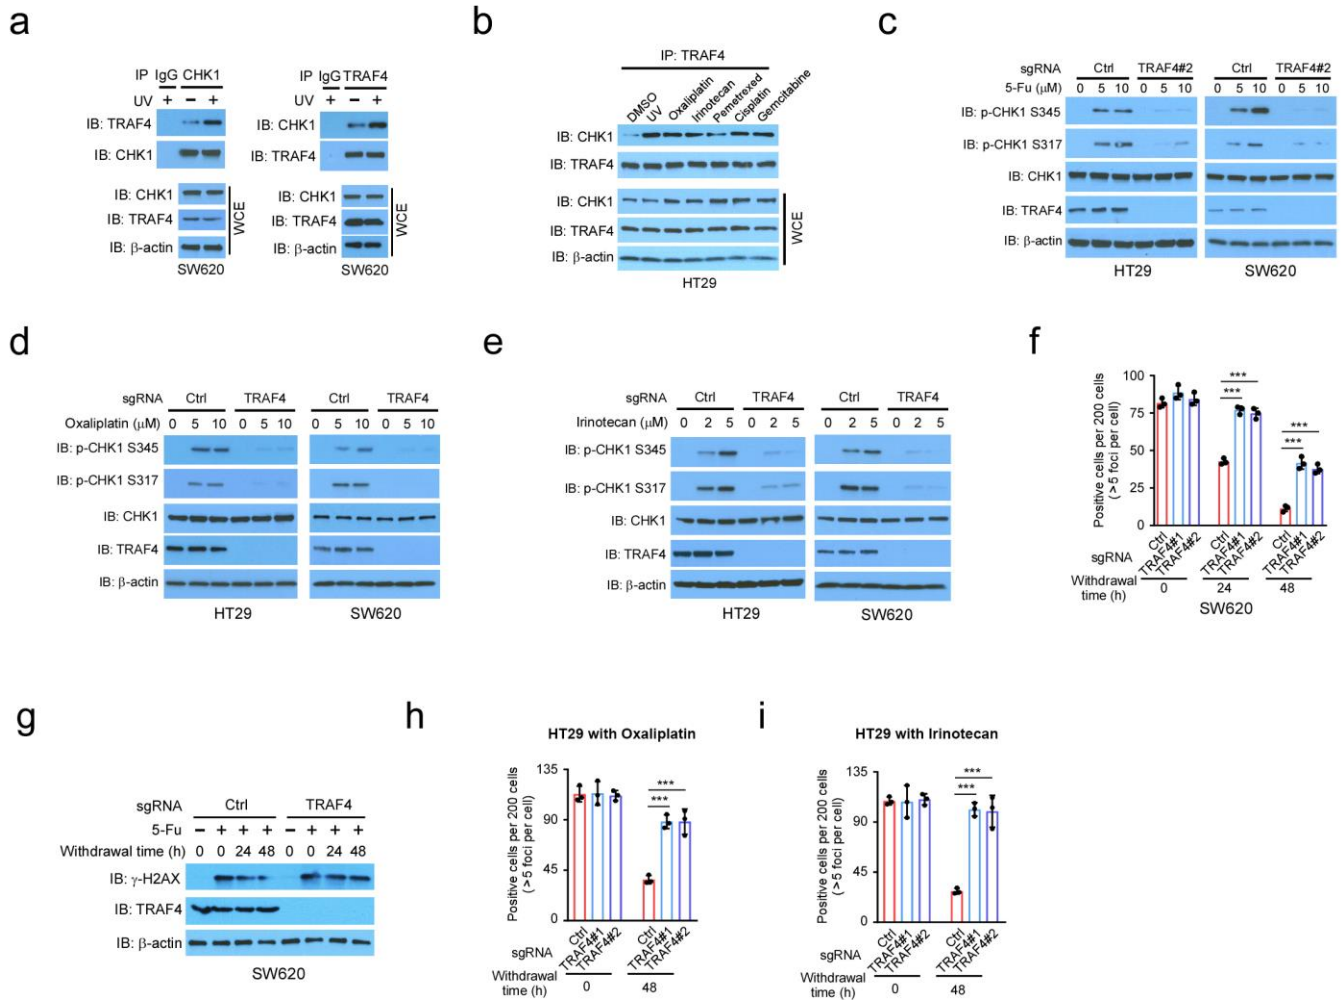

**Supplementary Figure 1. TRAF4 promotes CHK1 activation in response to DNA damage.** **a**, Co-IP analysis of the endogenous TRAF4-CHK1 interaction in SW620 cells. Cells were treated with UV, the whole-cell extracts (WCEs) were collected and subjected to a Co-IP assay and immunoblotting (IB) analysis. **b**, Co-IP analysis of endogenous TRAF4 and CHK1 interactions in HT29 cells. Cells were treated with chemotherapeutic agents, the WCEs were collected and subjected to Co-IP and IB analysis. UV treatment served as a positive control. **c**, Knockout of TRAF4 reduces CHK1 phosphorylation in 5-Fu-treated CRC cells. HT29 and SW620 cells expression sgCtrl or sgTRAF4 were treated with 5-Fu for 24 h, WCE was subjected to IB analysis. **d and e**, Knockout of TRAF4 reduces CHK1 phosphorylation in oxaliplatin- (**d**), or irinotecan-treated (**e**) HT29 and SW620 cells. **f and g**, TRAF4 knockout compromises DNA repair in 5-Fu-treated SW620 cells. TRAF4-WT or TRAF4-knockout SW620 cells were treated with 5-Fu for 24 h, then maintained in 5-Fu-free medium and subjected to IF (**f**) or IB (**g**) analysis at various time points with  $\gamma$ -H2AX antibody. \*\*\* $p < 0.001$ . **h and i**, TRAF4 knockout compromises DNA repair in oxaliplatin- (**h**) or irinotecan- (**i**) treated HT29 cells. TRAF4-WT or TRAF4-knockout HT29 cells were treated with oxaliplatin (**h**) or irinotecan (**i**) for 24 h, then maintained

in fresh medium without chemotherapeutic agents and subjected to IF analysis at various time points with the  $\gamma$ -H2AX antibody. \*\*\* $p < 0.001$ .

## Figure S2

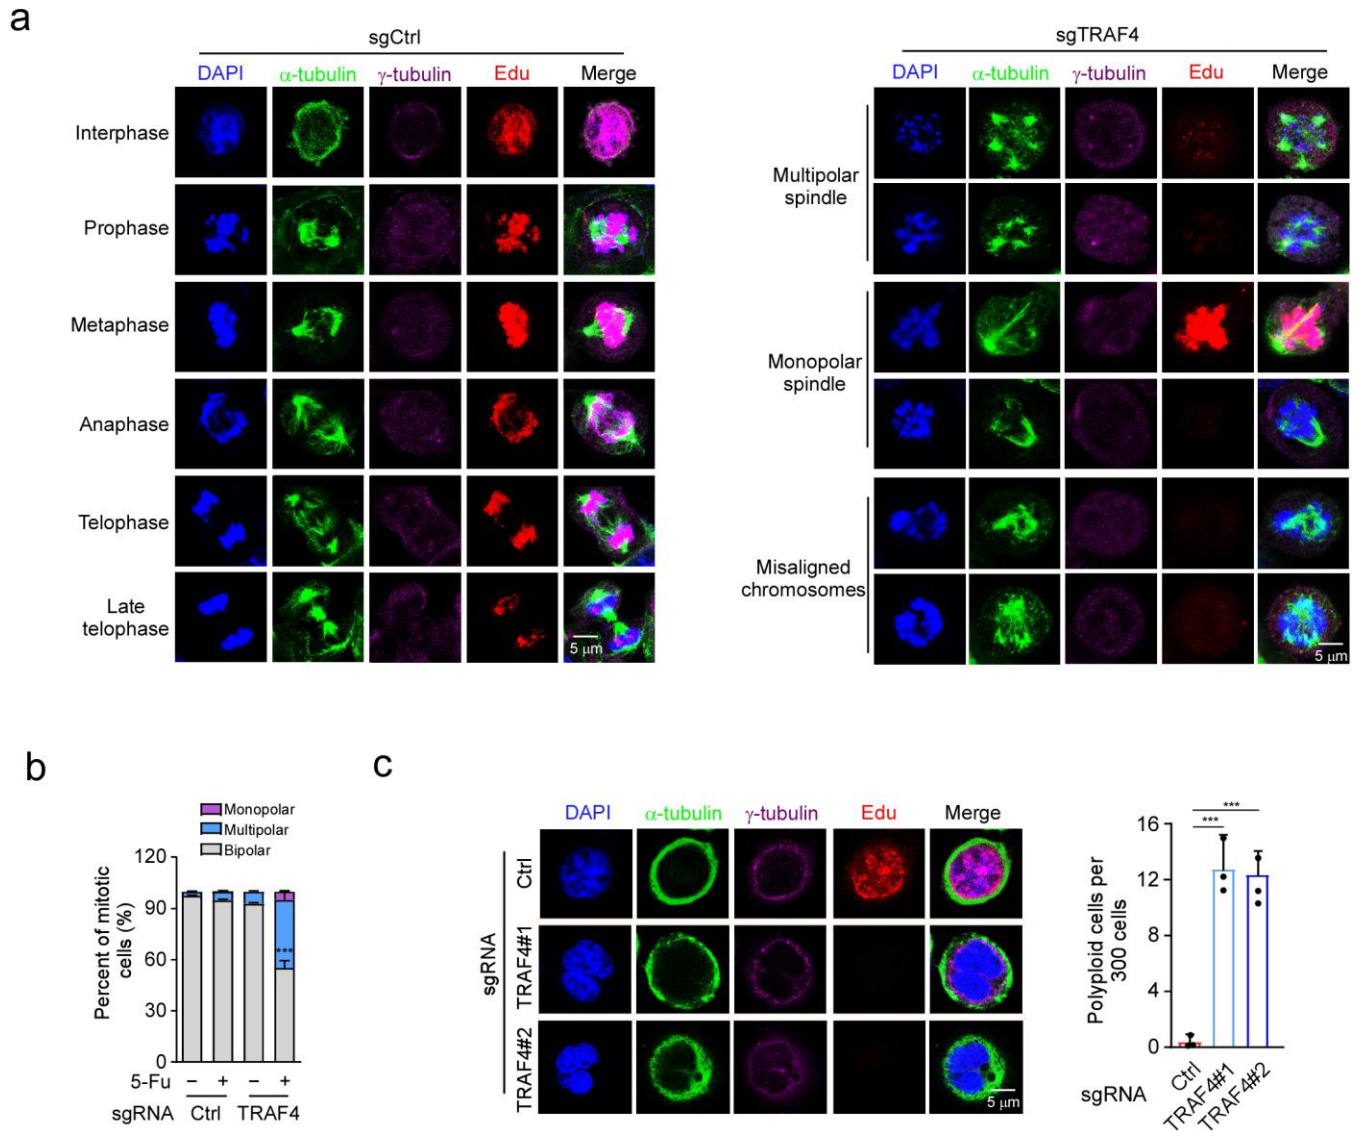

**Supplementary Figure 2. TRAF4 knockout results in 5-Fu-induced defects in mitosis and the formation of polyploidy HT29 cells.** **a** and **b**, TRAF4 knockout results in defects in mitosis. TRAF4-WT or TRAF4-knockout HT29 cells were treated with 5-Fu for 24 h. Cells were maintained in fresh medium containing 10  $\mu$ M 5-ethynyl-2'-deoxyuridine (Edu) for an additional 24 h and fixed for IF analysis with  $\alpha$ -tubulin and  $\gamma$ -tubulin antibodies (**a**). Quantification analysis of mitotic cells from **a** with a bipolar, multipolar, or monopolar spindle (**b**). \*\*\* $p < 0.001$ . **c**, TRAF4 knockout leads to the formation of polyploidy cells. TRAF4-WT or TRAF4-knockout HT29 cells were treated with 5-Fu for

24 h. Cells were maintained in fresh medium containing 10  $\mu$ M EdU for an additional 24 h and fixed for IF analysis with  $\alpha$ -tubulin and  $\gamma$ -tubulin antibodies, 5-Fu-induced polyploidy cells were quantified by cell counting. A total of 300 cells for each experiment were counted, and the result was shown from three independent experiments. \*\*\* $p < 0.001$ .

Figure S3

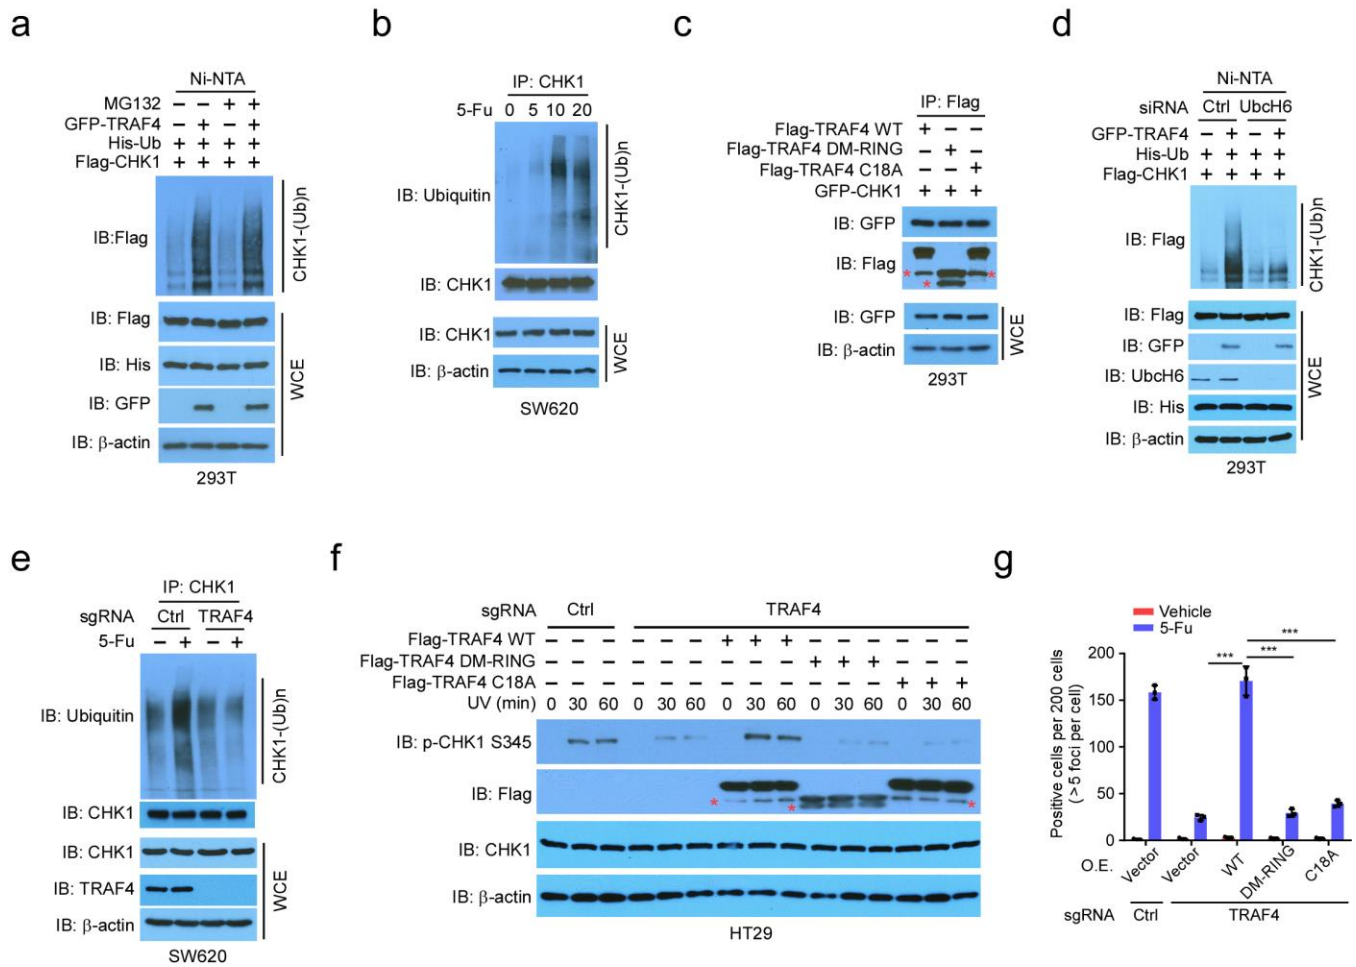

**Supplementary Figure 3. TRAF4 is required for CHK1 K63-linked ubiquitination.** **a**, *In vivo* ubiquitination assay in 293T cells transfected with various constructs and treated with MG132. **b**, 5-Fu promotes endogenous CHK1 ubiquitination in SW620 cells. **c**, 293T cells were transfected with the constructs and subjected to Co-IP analysis of CHK1 and TRAF4 mutant interactions. \*non-specific signal. **d**, Knockdown of UbcH6 inhibits TRAF4-mediated CHK1 ubiquitination. 293T cells were transfected with various constructs and siRNA, and the cell lysates were subjected to an *in vivo* ubiquitination assay. **e**, Knockout of TRAF4 impairs 5-Fu-induced endogenous CHK1 ubiquitination in SW620 cells. **f**, CHK1 phosphorylation in TRAF4-knockout cells is rescued by exogenous WT TRAF4. TRAF4-knockout HT29 cells were transfected with various constructs and treated with UV, WCEs were collected at different time points for IB analysis. **g**, IF analysis of CHK1 phosphorylation in 5-Fu-treated

HT29 cells. TRAF4-WT or TRAF4-knockout HT29 cells were transfected with various constructs and treated with 5-Fu for 24 h. Cells were fixed and subjected to IF analysis with p-CHK1 (S345) antibody. \*\*\* $p < 0.001$ .

Figure S4

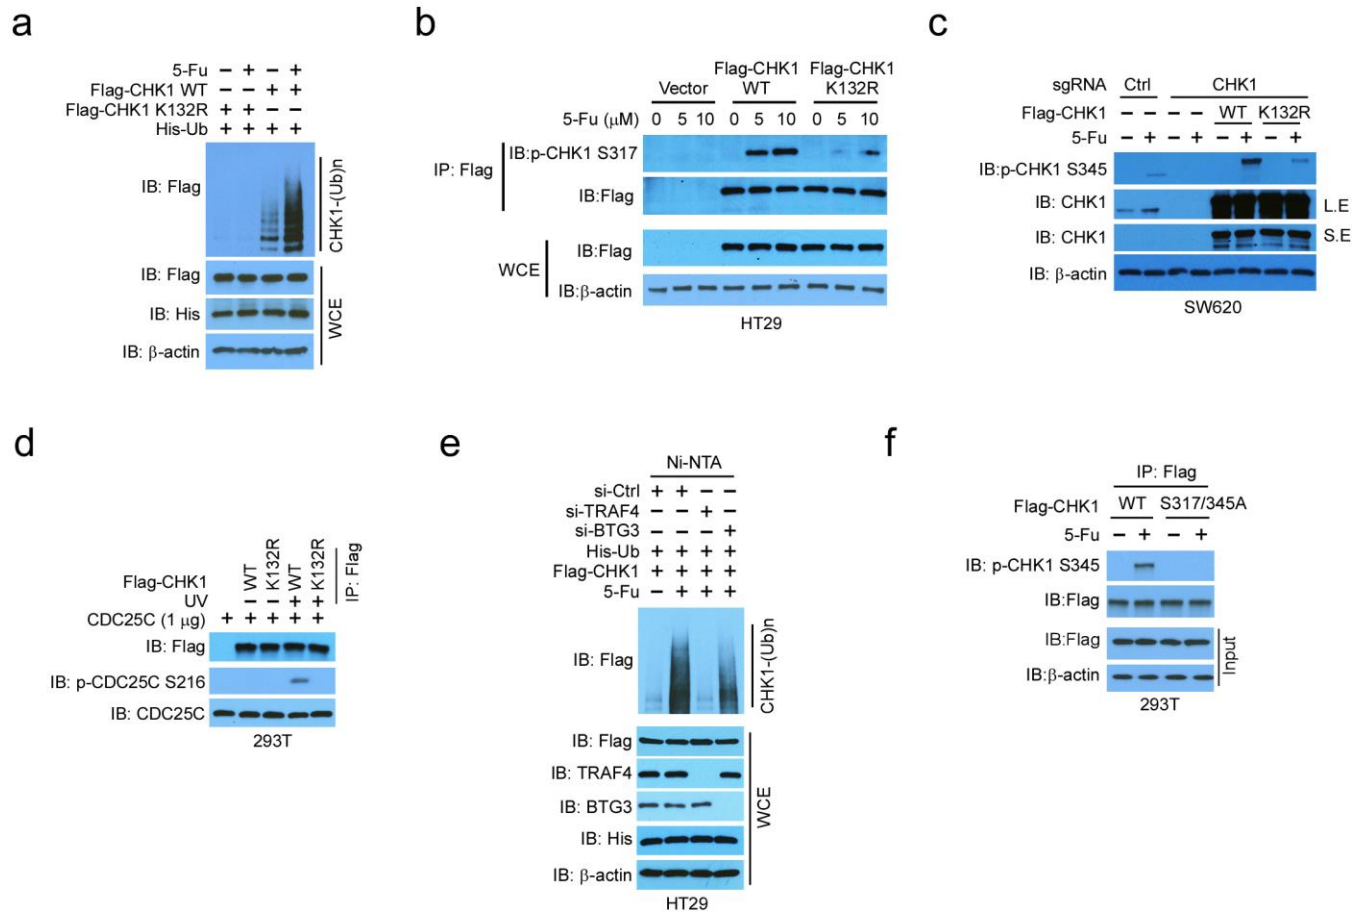

**Supplementary Figure 4. TRAF4 promoted K132 ubiquitination is required for CHK1 activation.**

**a**, *In vivo* ubiquitination assay in HT29 cells transfected with various constructs and treated with 5-Fu. **b**, The K132R mutation impairs CHK1 phosphorylation in HT29 cells. HT29 cells were transfected with different plasmids and treated with 5-Fu. WCEs were immunoprecipitated and subjected to IB analysis. **c**, CHK1 phosphorylation in CHK1-null SW620 cells is rescued by exogenous WT CHK1. CHK1 WT or CHK1 knockout SW620 cells transfected with CHK1 WT or CHK1 K132R mutant were treated with 5-Fu and subjected to IB analysis. **d**, *In vitro* kinase assay of the CHK1 WT and K132R mutant. 293T cells were transfected with various constructs and treated with 5-Fu. WCEs were extracted and immunoprecipitated with Flag-tag antibody. The IP proteins were incubated with Cdc25C and subjected to an *in vitro* kinase assay. **e**, Knockdown of TRAF4 or BTG3 inhibits CHK1 ubiquitination in HT29



cells. HT29 cells transfected with siRNA and various constructs followed by 5-Fu treatment, WCE was subjected to *in vivo* ubiquitination assay. **f**, Phosphorylation of CHK1 WT and the S317/345 mutant upon 5-Fu treatment in 293T cells.

Figure S5

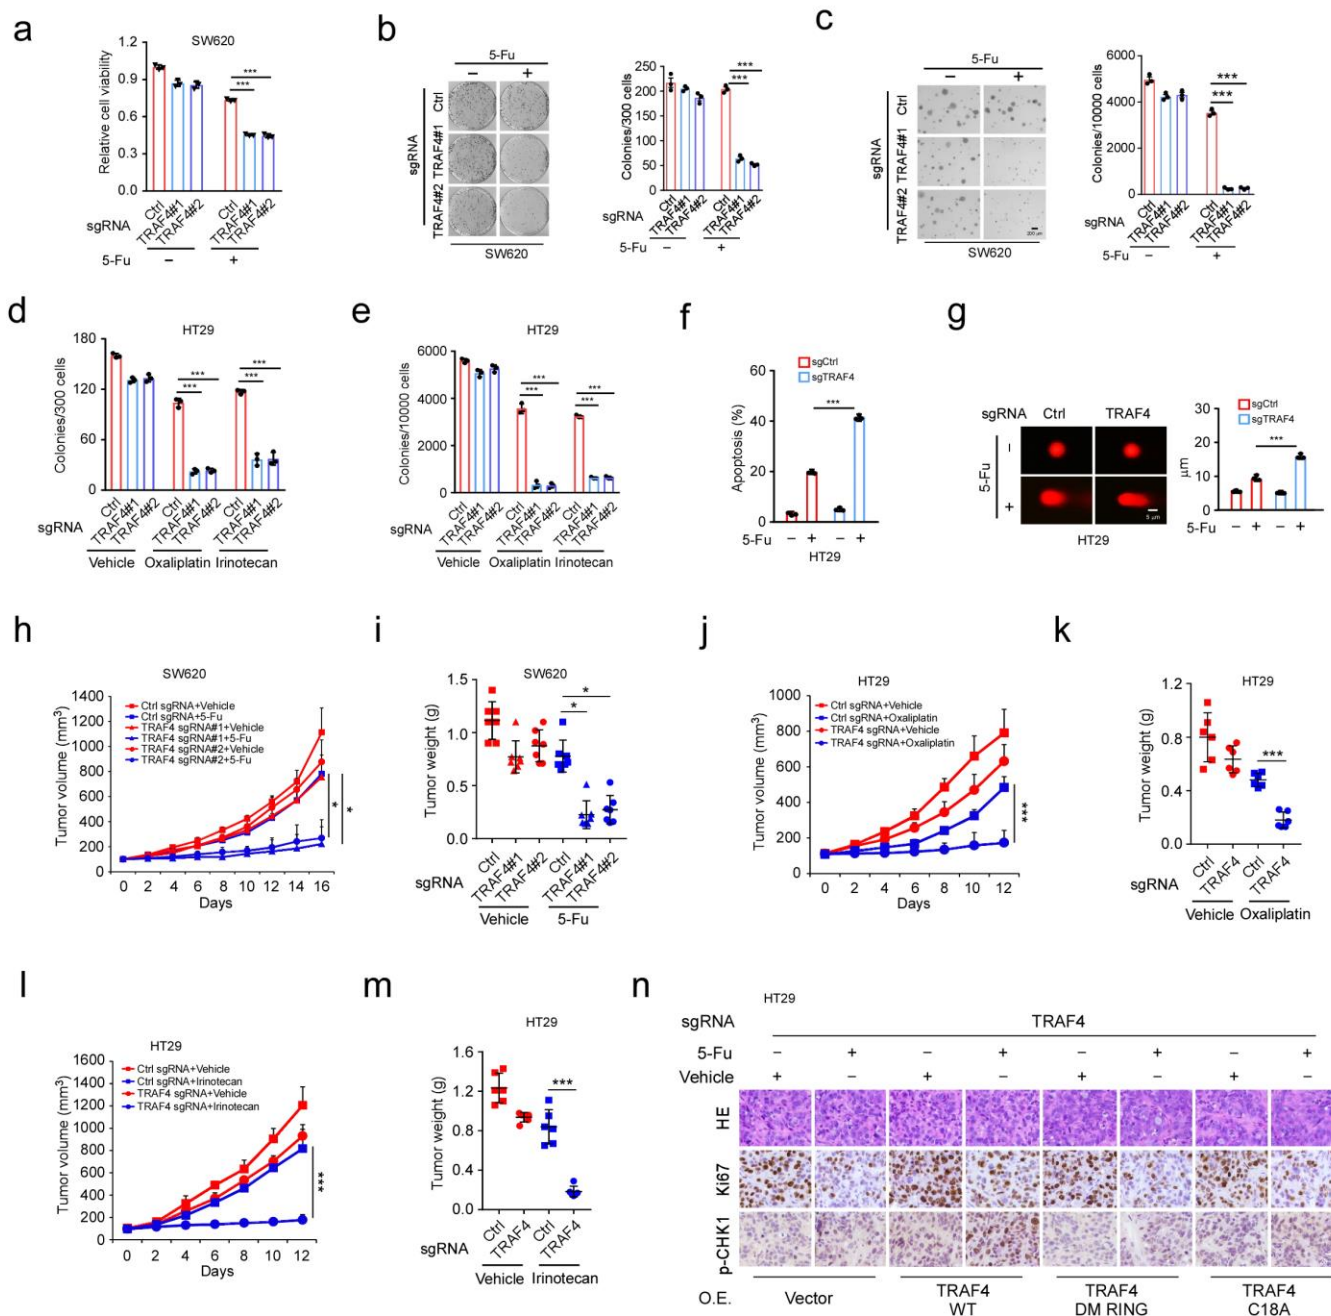

**Supplementary Figure 5. Depletion of TRAF4 heightens the anti-tumor effect of chemotherapeutic agents in CRC. a**, TRAF4 knockout reduces cell viability in SW620 cells with 5-Fu treatment. SW620

cells expression sgCtrl or sgTRAF4 were treated with 5-Fu for 72 h and analyzed with MTS assay. \*\*\* $p < 0.001$ . **b** and **c**, Anchorage-dependent (**b**) and –independent (**c**) growth of TRAF4-WT or TRAF4-knockout SW620 cells with 5-Fu treatment. \*\*\* $p < 0.001$ . **d** and **e**, Anchorage-dependent (**d**) and –independent (**e**) growth of TRAF4-WT or TRAF4-knockout HT29 cells with oxaliplatin and irinotecan treatment. \*\*\* $p < 0.001$ . **f**, TRAF4 knockout enhances 5Fu-induced apoptosis. Flow cytometry analysis of apoptotic cells in 5-Fu-treated HT29 stable cells. **g**, TRAF4 knockout enhances 5Fu-induced DNA damage. Comet assay analysis of DNA damage in 5-Fu-treated HT29 stable cells. **h** and **i**, TRAF4 knockout enhances the efficacy of 5-Fu *in vivo*. TRAF4-WT or TRAF4-knockout SW620 cells were injected into NSG mice to create xenografts and mice then were treated with vehicle control or 5-Fu. Tumor sizes were monitored (**h**), and the tumor masses were weighed (**i**). \* $p < 0.05$ . **j** and **k**, TRAF4 knockout enhances the efficacy of oxaliplatin in HT29 xenografts *in vivo*. Tumor size was monitored (**j**), and the tumors were weighed at the study endpoint (**k**). \*\*\* $p < 0.001$ . **l** and **m**, TRAF4 knockout enhances the efficacy of irinotecan *in vivo*. TRAF4-WT or TRAF4-knockout HT29 cells injected into NSG mice to create xenografts and mice then were treated with vehicle control or irinotecan. Tumor size was monitored (**l**), and the tumors were weighed (**m**). \*\*\* $p < 0.001$ . **n**, TRAF4 reintroduction into TRAF4-null HT29 cells rescues tumorigenesis under 5-Fu treatment. TRAF4 WT or E3 ligase activity deficient mutants were reintroduced into TRAF4-null HT29 cells and injected into NSG mice to establish the xenograft mouse model. Ki67 and p-CHK1 were examined via IHC staining.

## Figure S6

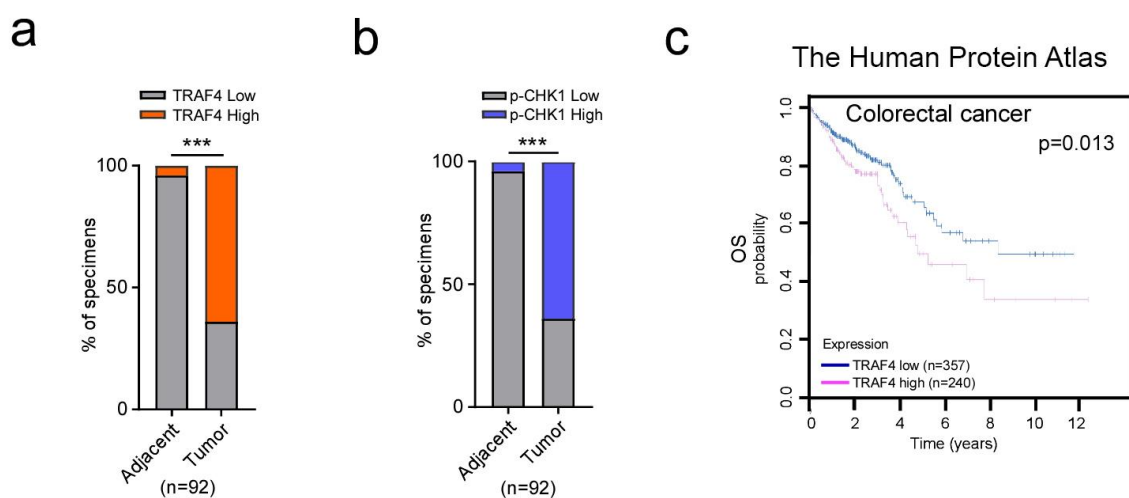

**Supplementary Figure 6. TRAF4 overexpression correlates with CHK1 phosphorylation and poor prognosis in CRC patients.** **a**, Percentage of adjacent and tumor tissues from 92 patients with CRC

displaying low or high TRAF4 expression. \*\*\* $p < 0.001$ . **b**, Percentage of adjacent and tumor tissues displaying low or high p-CHK1 (S345) levels. \*\*\* $p < 0.001$ . **c**, Kaplan–Meier curves show the relationship between overall survival and TRAF4 expression in CRC patients. Data were obtained from the Human Protein Atlas (<https://www.proteinatlas.org>).

Figure S7

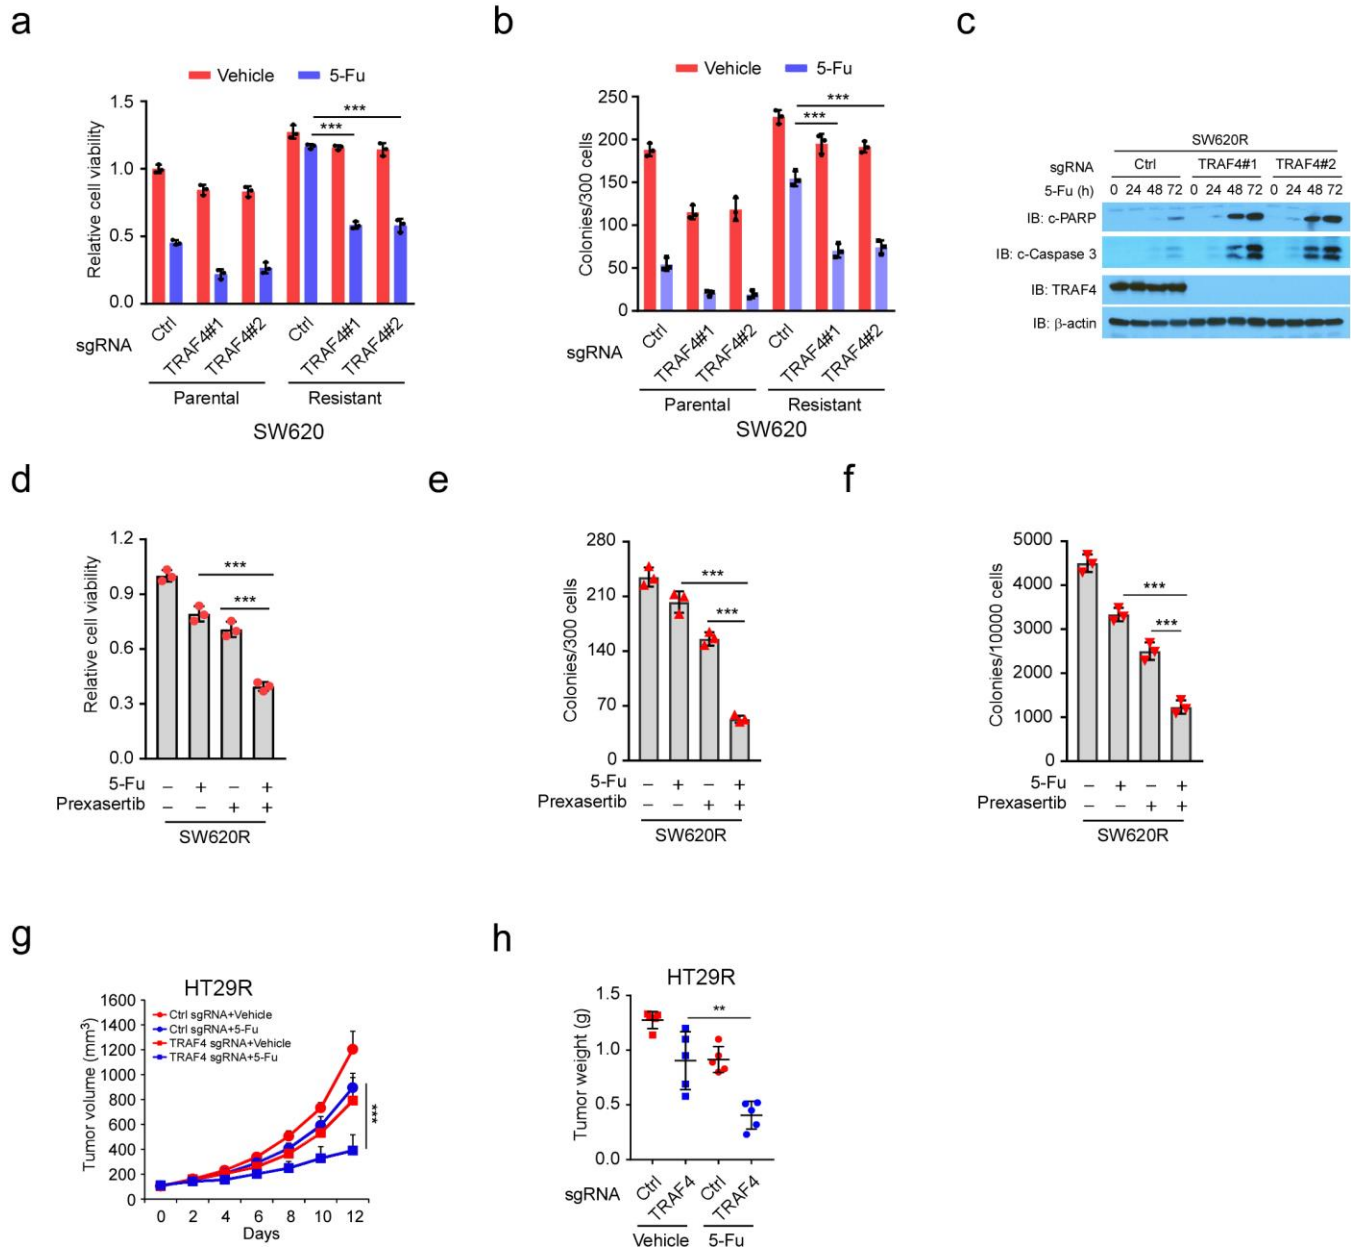

**Supplementary Figure 7. CHK1 inhibitor sensitizes CRC cells to chemotherapy.** **a**, TRAF4 knockout enhances the sensitivity of SW620 cells to 5-Fu. SW620 parental cells and 5-Fu-resistant (SW620R) cells were transfected with control or TRAF4 sgRNA and selected with puromycin to

construct stable cell lines. The generated control and TRAF4-knockout stable cells were treated with 100 $\mu$ M 5-Fu for 72 h and subjected to an MTS assay. \*\*\*p < 0.001. **b**, TRAF4 knockout reduces colony formation in SW620 cells treated with 5-Fu. The stable cells generated in **a** were treated with 100 $\mu$ M 5-Fu for 24 h and subjected to a plate colony-formation assay. \*\*\*p < 0.001. **c**, IB analysis of apoptosis-related proteins in SW620R stable cells treated with 100 $\mu$ M 5-Fu. **d–f**, Cell viability (**d**), anchorage-dependent (**e**) and -independent (**f**) cell growth of SW620R cells treated with vehicle control, 100 $\mu$ M 5-Fu, prexasertib, and the combination 5-Fu + prexasertib. \*\*\*p < 0.001. **g** and **h**, Tumorigenesis of HT29R cells expression sgCtrl or sgTRAF4 treated with 5-Fu. TRAF4-WT or TRAF4-knockout HT29R cells injected into NSG mice to create xenografts and mice then were treated with vehicle control or 5-Fu. Tumor size was monitored (**g**), and tumors were weighed (**h**). \*\*p < 0.01, \*\*\*p < 0.001.
