# Supplementary material for: Ubiquitination of the DNA-damage checkpoint kinase CHK1 by TRAF4 is required for CHK1 activation
Source: Springer Nature journal article supplement (doi:10.1186/s13045-020-00869-3), 2020-05-01
Supplement: MOESM2 [file 17948352]

Table 1. TRAF4 protein expression in colon cancer tissue and adjacent tissue.

| <b>Tissue</b> | <b>Number of Cases</b> | <b>TRAF4</b> |             | <b>p-value</b> |
|---------------|------------------------|--------------|-------------|----------------|
|               |                        | <b>Low</b>   | <b>High</b> |                |
| Adjacent      | 92                     | 88           | 4           | 0.000          |
| Tumor         | 92                     | 33           | 59          |                |

Chi-square test.

p<0.05 indicates a significant association among the variables.

Table 2. p-Chk1 protein expression in colon cancer tissue and adjacent normal tissue.

| Tissue sample | Number of Cases | p-Chk1 |      | p-value |
|---------------|-----------------|--------|------|---------|
|               |                 | Low    | High |         |
| Adjacent      | 92              | 87     | 5    | 0.000   |
| Tumor         | 92              | 40     | 52   |         |

Chi-square test.

p<0.05 indicates a significant association among the variables.

Table 3. Relationships between the expression of TRAF4 and clinical pathological characteristics in colon cancer patients.

| Characteristics               | Number of Cases | Expression of TRAF4 |             | p-value |
|-------------------------------|-----------------|---------------------|-------------|---------|
|                               |                 | Low (n=33)          | High (n=59) |         |
| <b>Gender</b>                 |                 |                     |             | 0.455   |
| Male                          | 51              | 20                  | 31          |         |
| Female                        | 41              | 13                  | 28          |         |
| <b>Age (years)</b>            |                 |                     |             | 0.151   |
| ≤60                           | 30              | 9                   | 21          |         |
| >60                           | 62              | 24                  | 38          |         |
| <b>Initial clinical stage</b> |                 |                     |             | 0.000   |
| ≤IIa                          | 48              | 28                  | 20          |         |
| >IIa                          | 44              | 5                   | 39          |         |
| <b>Tumor stages</b>           |                 |                     |             | 0.780   |
| T1+T2                         | 29              | 11                  | 18          |         |
| T3+T4                         | 63              | 22                  | 41          |         |
| <b>Lymph node status</b>      |                 |                     |             | 0.000   |
| N0 (negative)                 | 50              | 28                  | 22          |         |
| N1 or above (positive)        | 42              | 5                   | 37          |         |

Chi-square test.

p<0.05 indicates a significant association among the variables.

Table 4. Relationships between the expression of p-CHK1 and clinical pathological characteristics in colon cancer patients.

| Characteristics               | All cases | Expression of p-CHK1 |             | p-value |
|-------------------------------|-----------|----------------------|-------------|---------|
|                               |           | Low (n=35)           | High (n=57) |         |
| <b>Gender</b>                 |           |                      |             | 0.267   |
| Male                          | 51        | 20                   | 31          |         |
| Female                        | 41        | 15                   | 26          |         |
| <b>Age (years)</b>            |           |                      |             | 0.850   |
| ≤60                           | 30        | 11                   | 19          |         |
| >60                           | 62        | 24                   | 38          |         |
| <b>Initial clinical stage</b> |           |                      |             | 0.004   |
| ≤IIa                          | 48        | 25                   | 23          |         |
| >IIa                          | 44        | 10                   | 34          |         |
| <b>Tumor stages</b>           |           |                      |             | 0.988   |
| T1+T2                         | 29        | 11                   | 18          |         |
| T3+T4                         | 63        | 24                   | 39          |         |
| <b>Lymph nodes status</b>     |           |                      |             | 0.010   |
| N0 (negative)                 | 50        | 25                   | 25          |         |
| N1 or above (positive)        | 42        | 10                   | 32          |         |

Chi-square test.

p<0.05 indicates a significant association among the variables.
